# Supplementary material for: Rhodium, palladium and platinum complexes of tris(pyridylalkyl)amine and tris(benzimidazolylmethyl)amine N4-tripodal ligands
Source: Royal Society of Chemistry journal article supplement (doi:10.1039/b602556k), 2006-01-01
Supplement: b602556k1.pdf [file b602556k1.pdf]

---

**Rhodium, palladium and platinum complexes of tris(pyridylalkyl)amine and tris(benzimidazolymethyl)amine  $N_4$ -tripodal ligands**

David G. Lonnon, Donald C. Craig and Stephen B. Colbran\*

---

**B. Additional NMR spectroscopy figures**

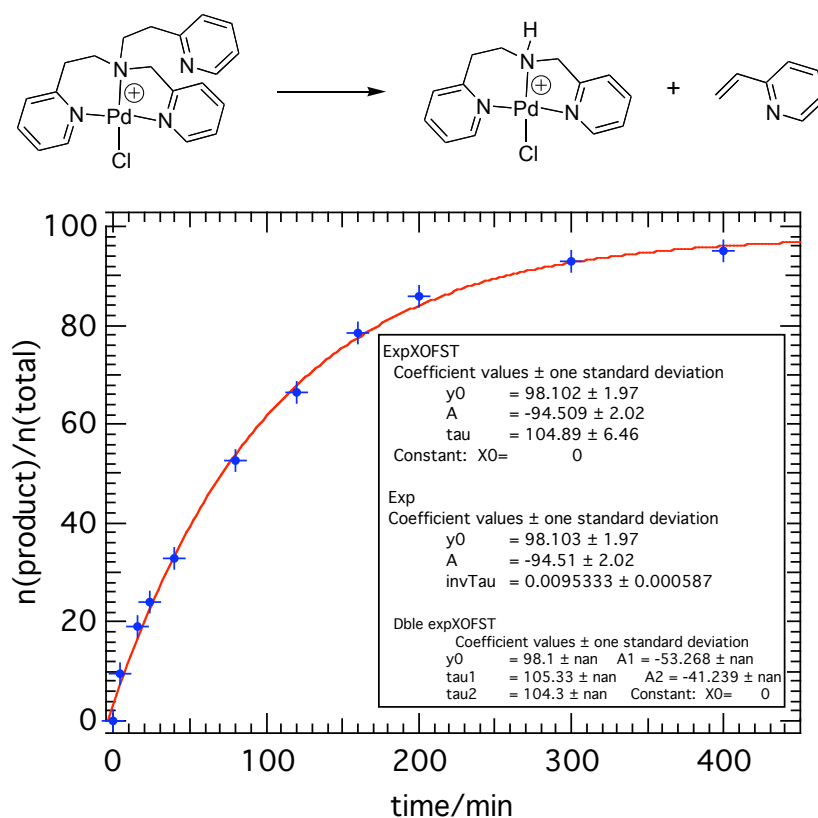

**ESI Fig. B1.** Plot of the %product against time for the conversion of  $[\text{Pd}(\text{pmap})\text{Cl}]^+$  to  $[\text{Pd}(\text{epmpa})\text{Cl}]^+$  at 390 K in  $d_6$ -dmsO. The points are the experimental data from the 300 MHz  $^1\text{H}$  NMR spectra shown in Figure 8 (in the paper) and the curve shows the fit of the data to a single exponential.

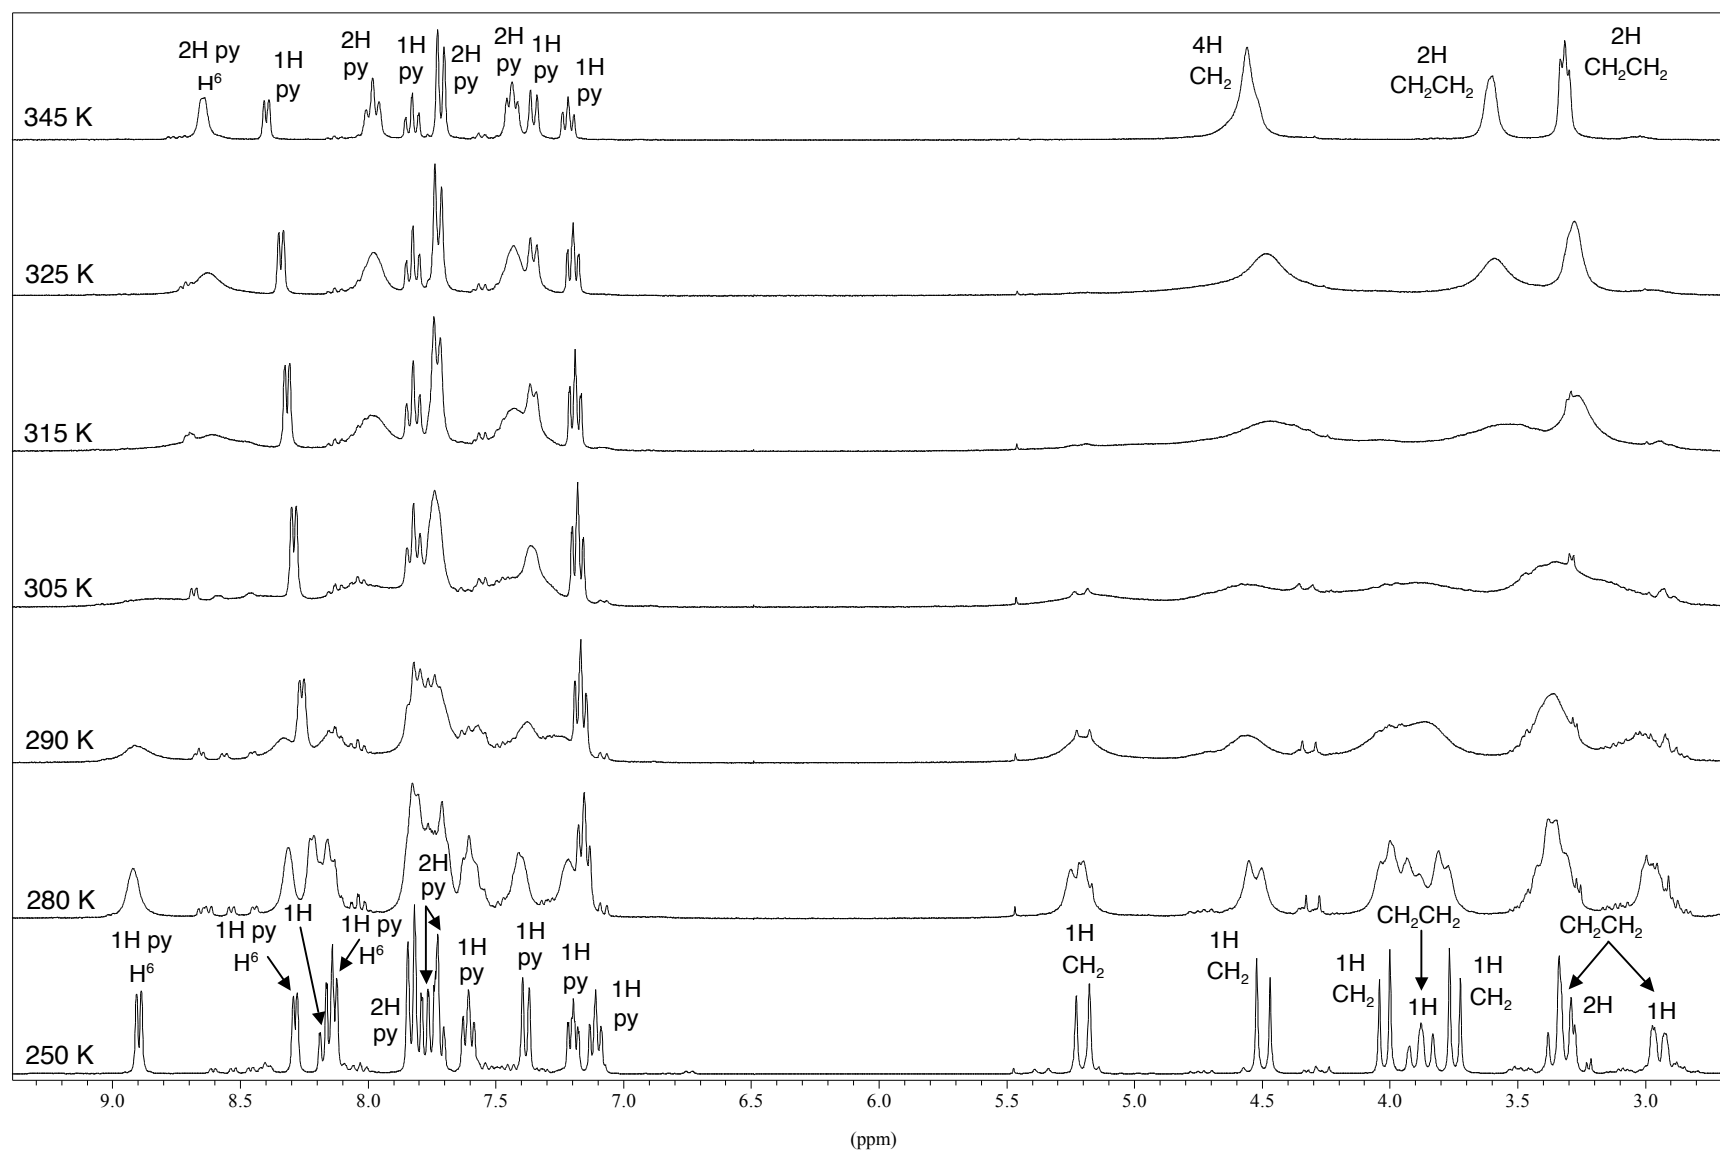

**ESI Fig. B2:** Variable temperature 300 MHz  $^1\text{H}$  NMR spectra of  $[\text{Pd}(\text{pmea})\text{Cl}]\text{Cl}$  in  $\text{CD}_3\text{CN}$ .

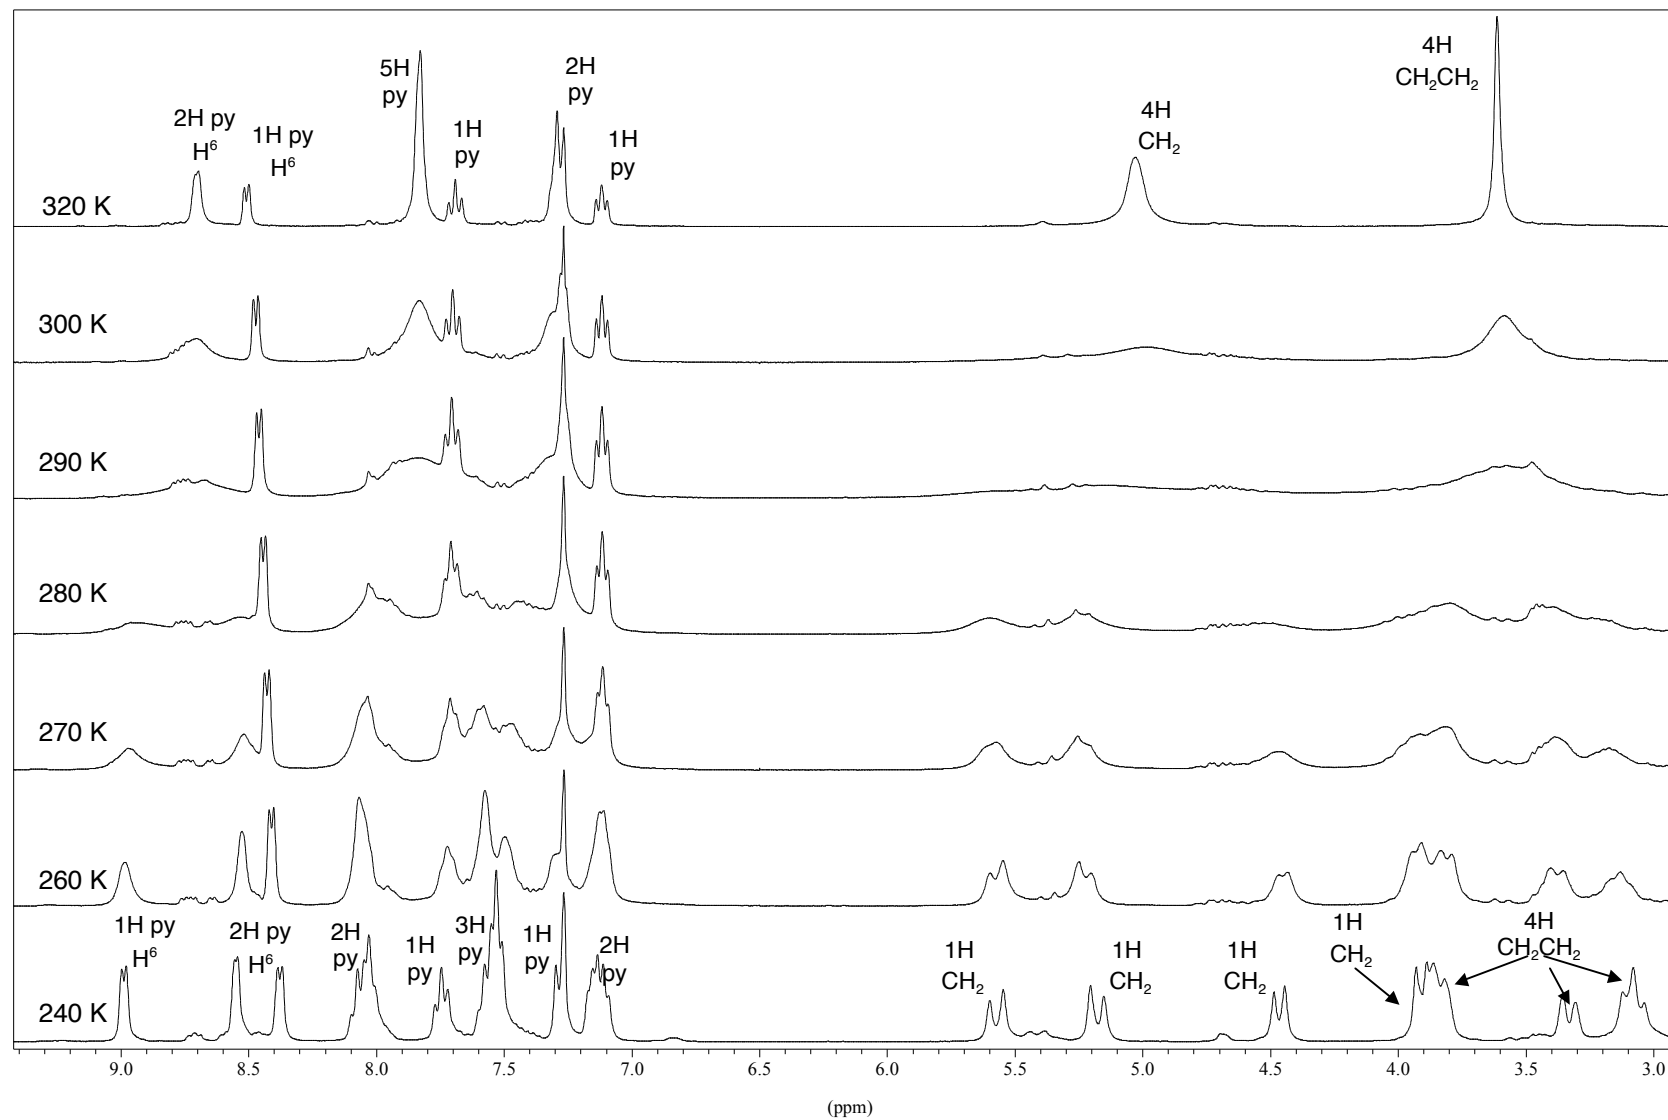

**ESI Fig. B3:** Variable temperature 300 MHz <sup>1</sup>H NMR spectra of [Pd(pmea)Cl]Cl in CD<sub>3</sub>Cl.

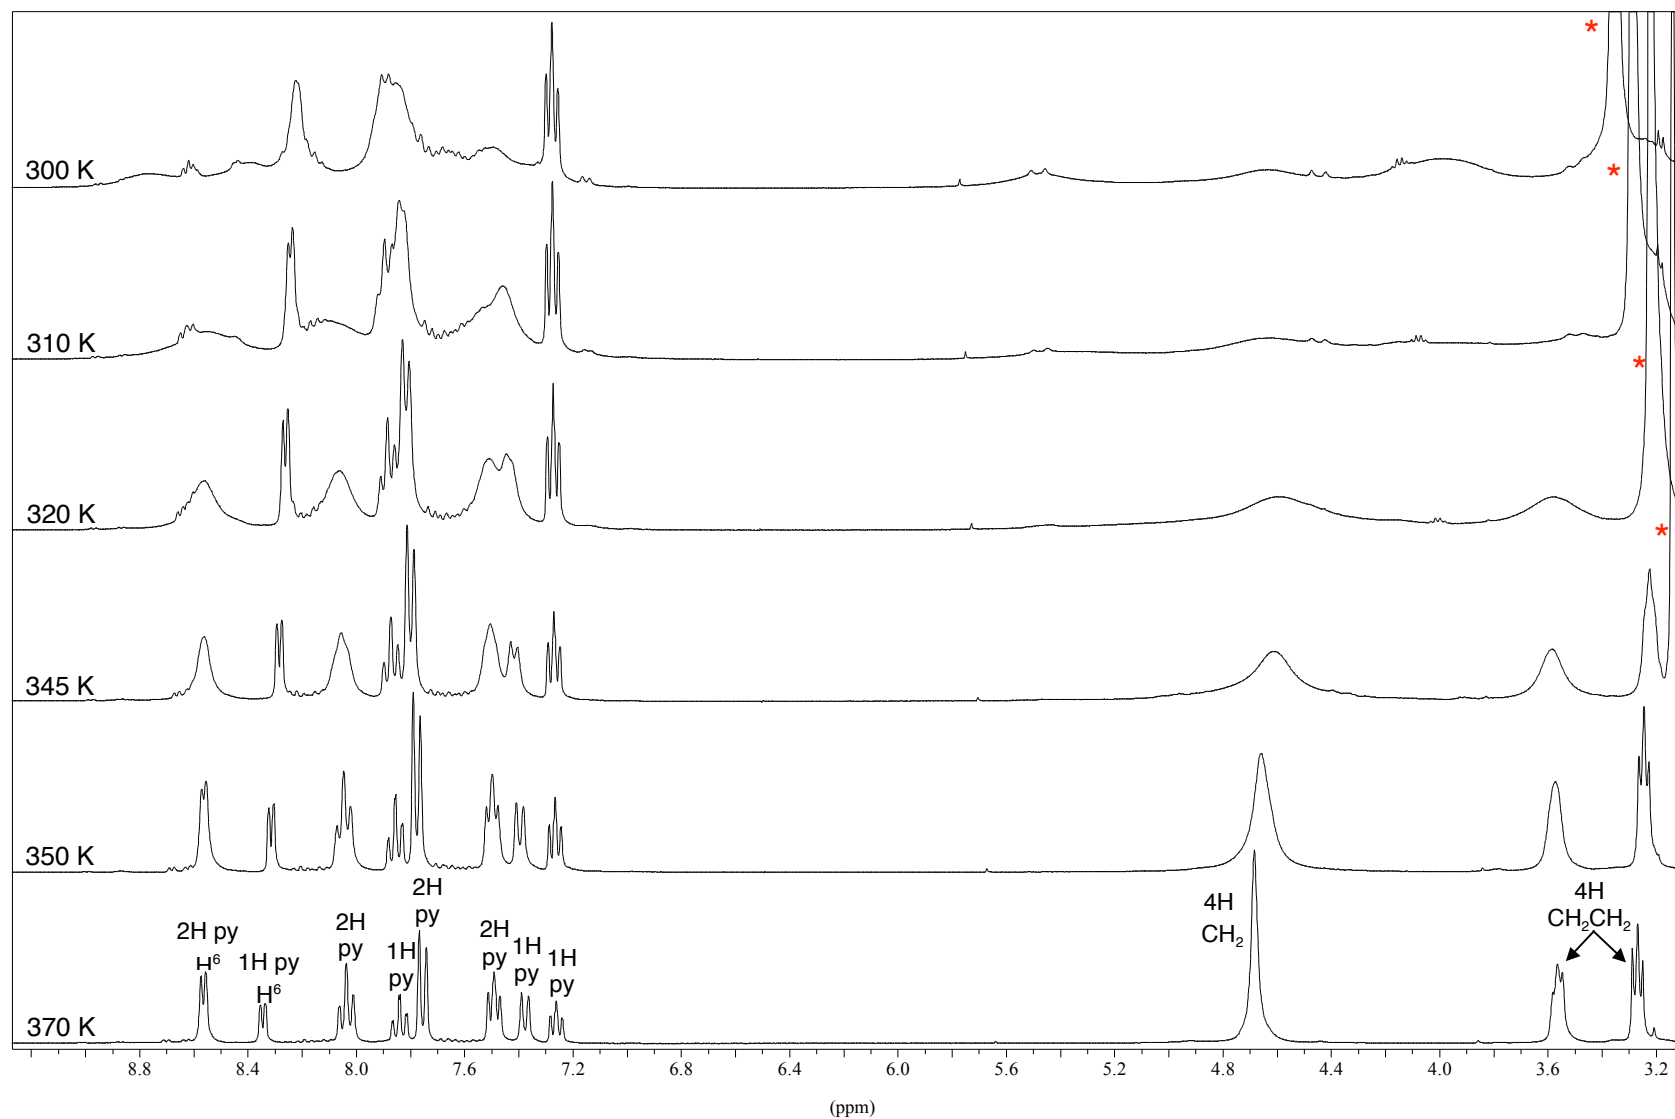

**ESI Figure B4:** 300 MHz variable temperature  $^1\text{H}$  NMR spectra of  $[\text{Pd}(\text{pmea})\text{Cl}]\text{Cl}$  in  $d_6$ -dmsO (\* denotes water). Note: The spectra in ESI Figs B2–B4 show peaks for only the asymmetric isomer with one bound and one dangling pyridylmethyl legs (see text of paper).

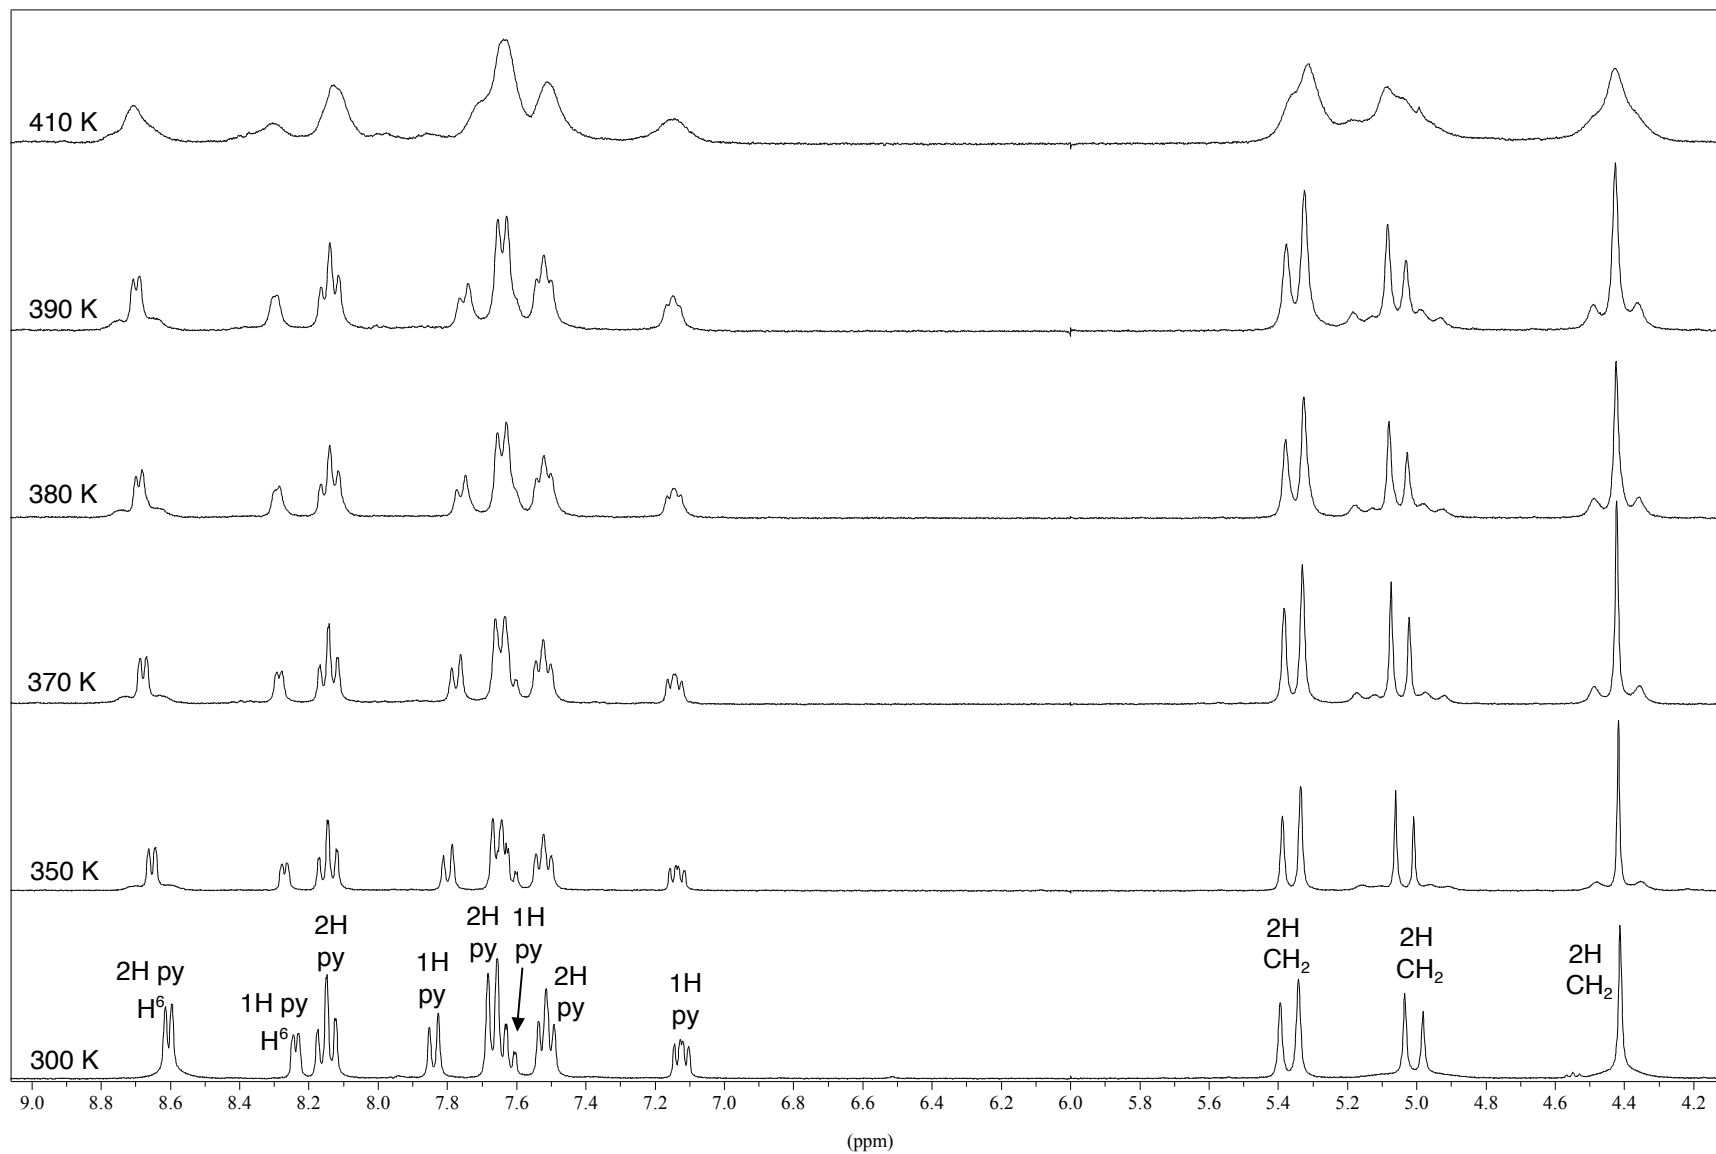

**ESI Fig. B5:** Variable temperature 300 MHz  $^1\text{H}$  NMR spectra of  $[\text{Pt}(\text{tpma})\text{Cl}]\text{Cl}$  in  $d_6$ -dmsO.

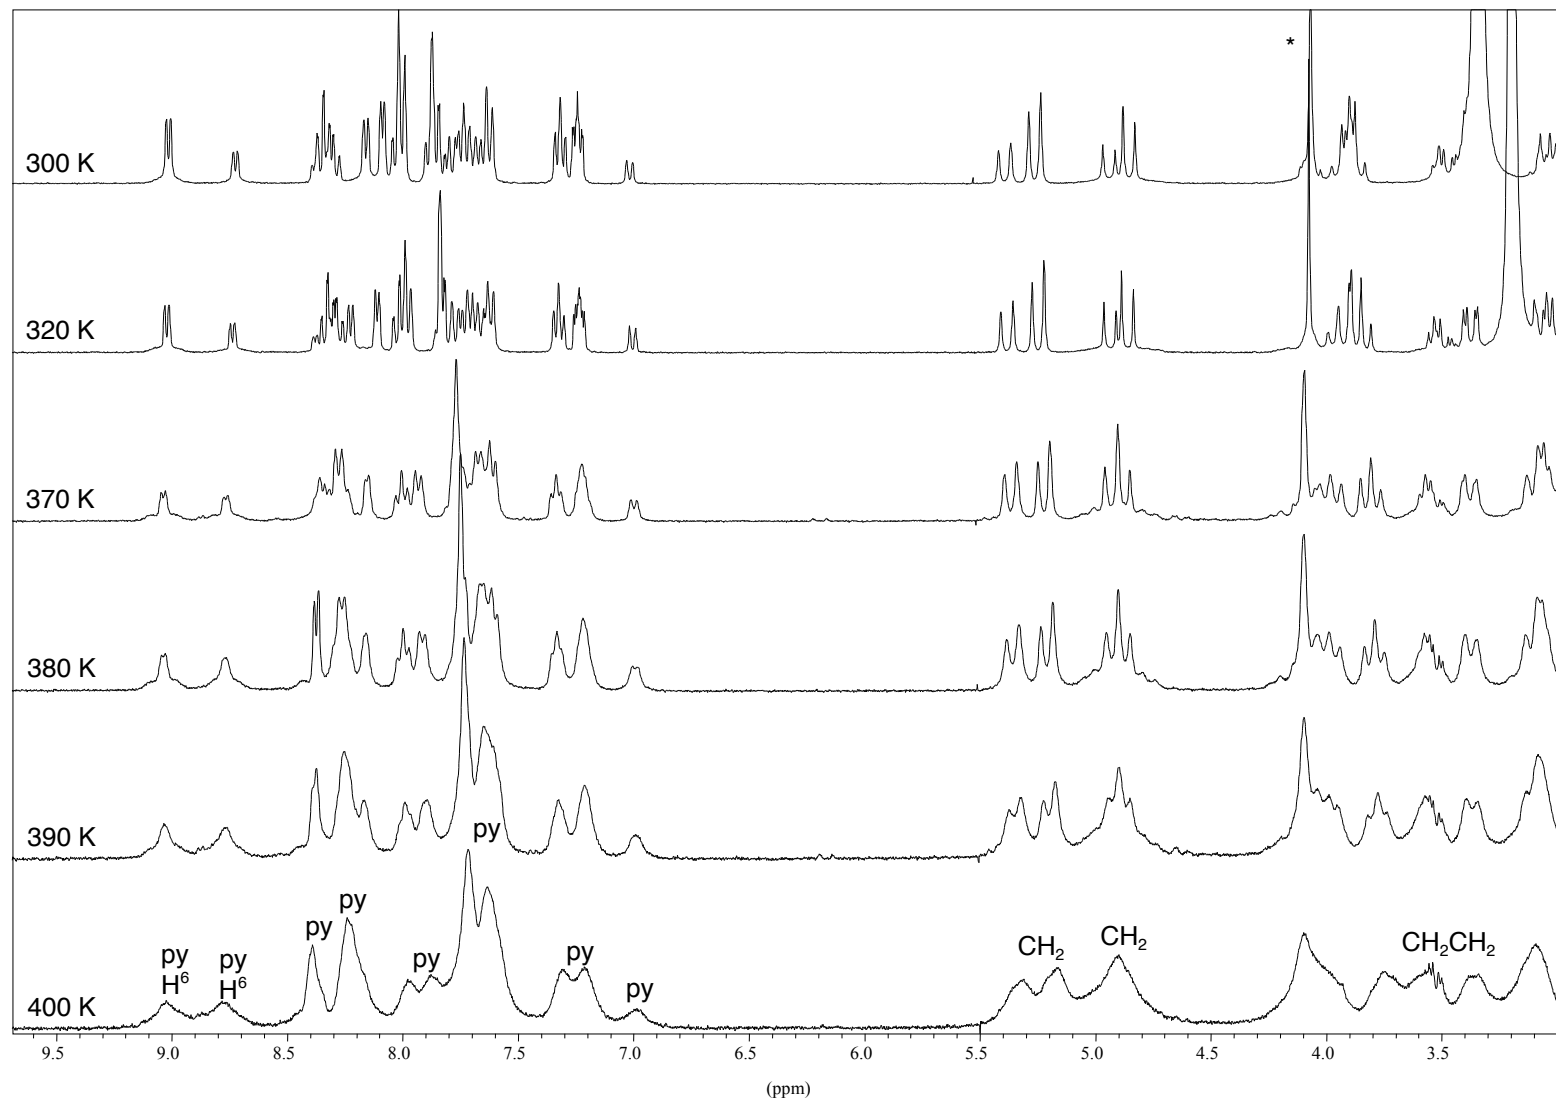

**ESI Fig. B6:** 300 MHz variable temperature <sup>1</sup>H NMR spectra of [Pt(pmea)Cl]Cl (two isomers — see text of the paper) in d<sub>6</sub>-dmsO. All changes were fully reversed upon cooling.

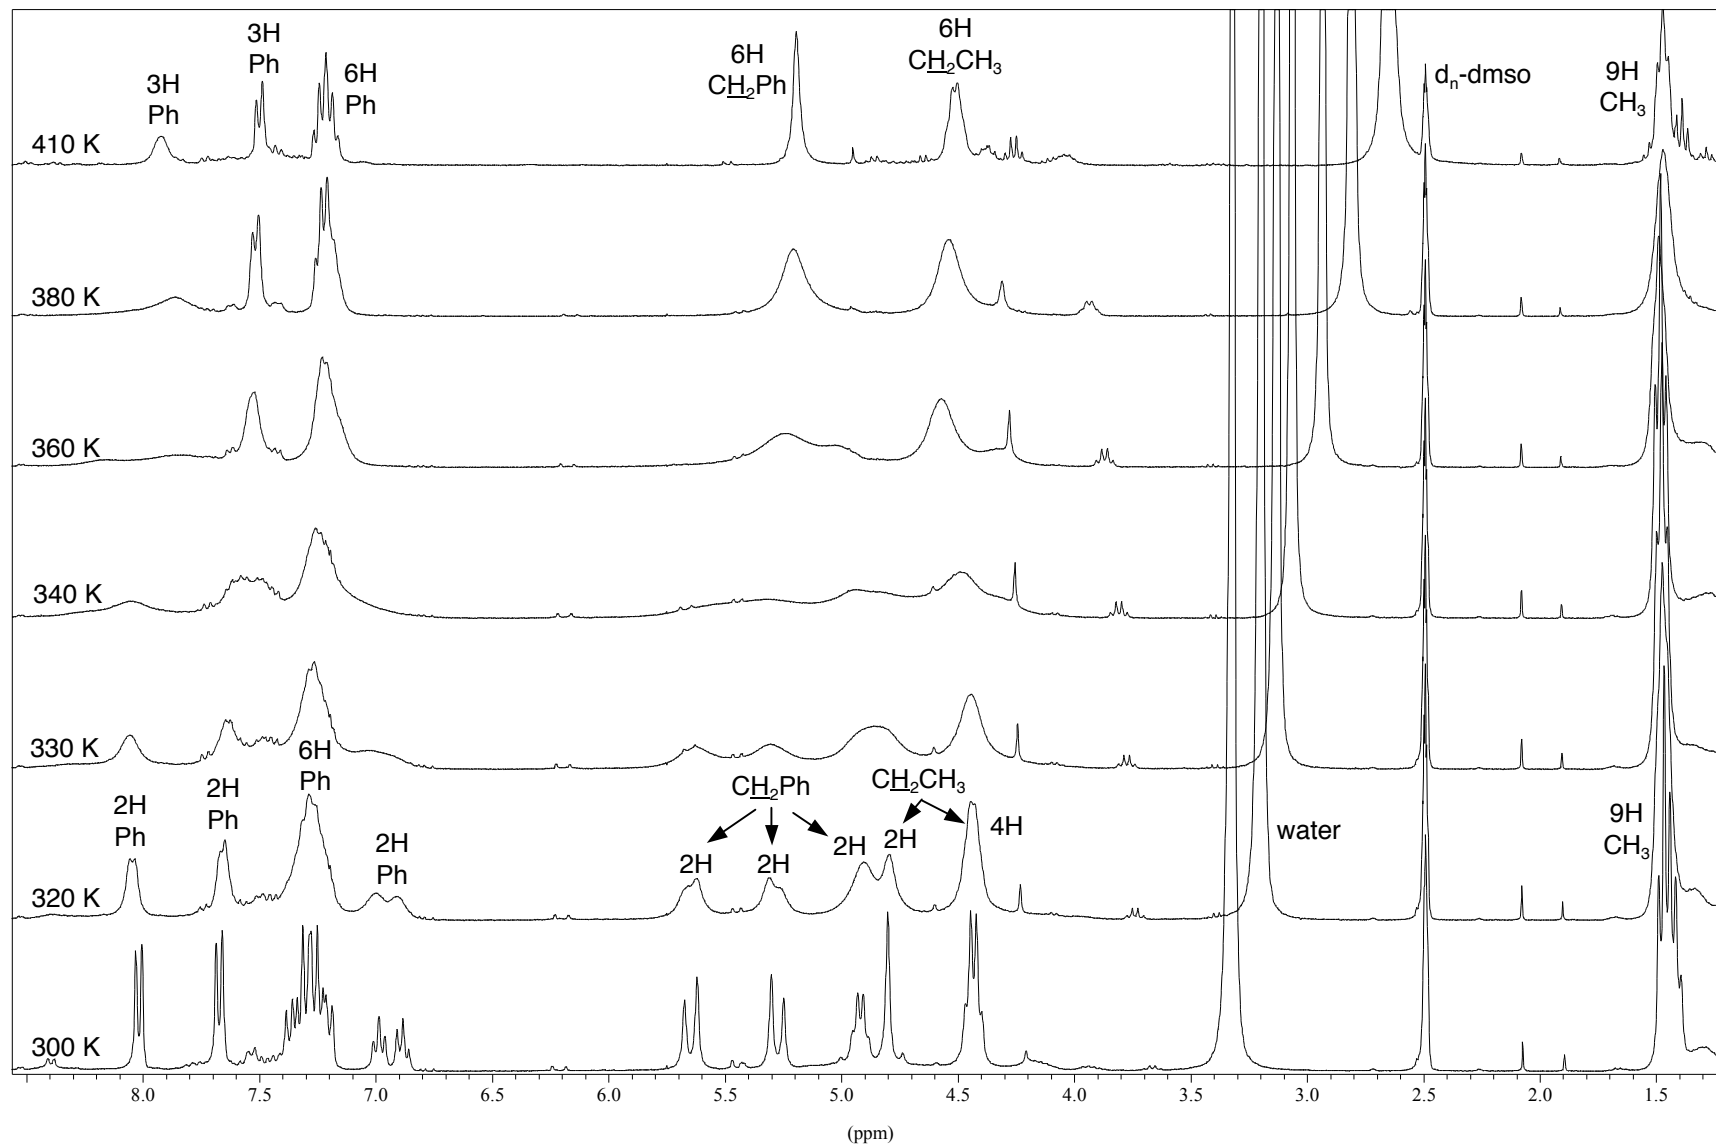

**ESI Fig. B7:** Variable temperature 300 MHz  $^1\text{H}$  NMR spectra of  $[\text{Pd}(\text{Et-tbima})\text{Cl}]\text{Cl}$  in  $d_6$ -dmsol.

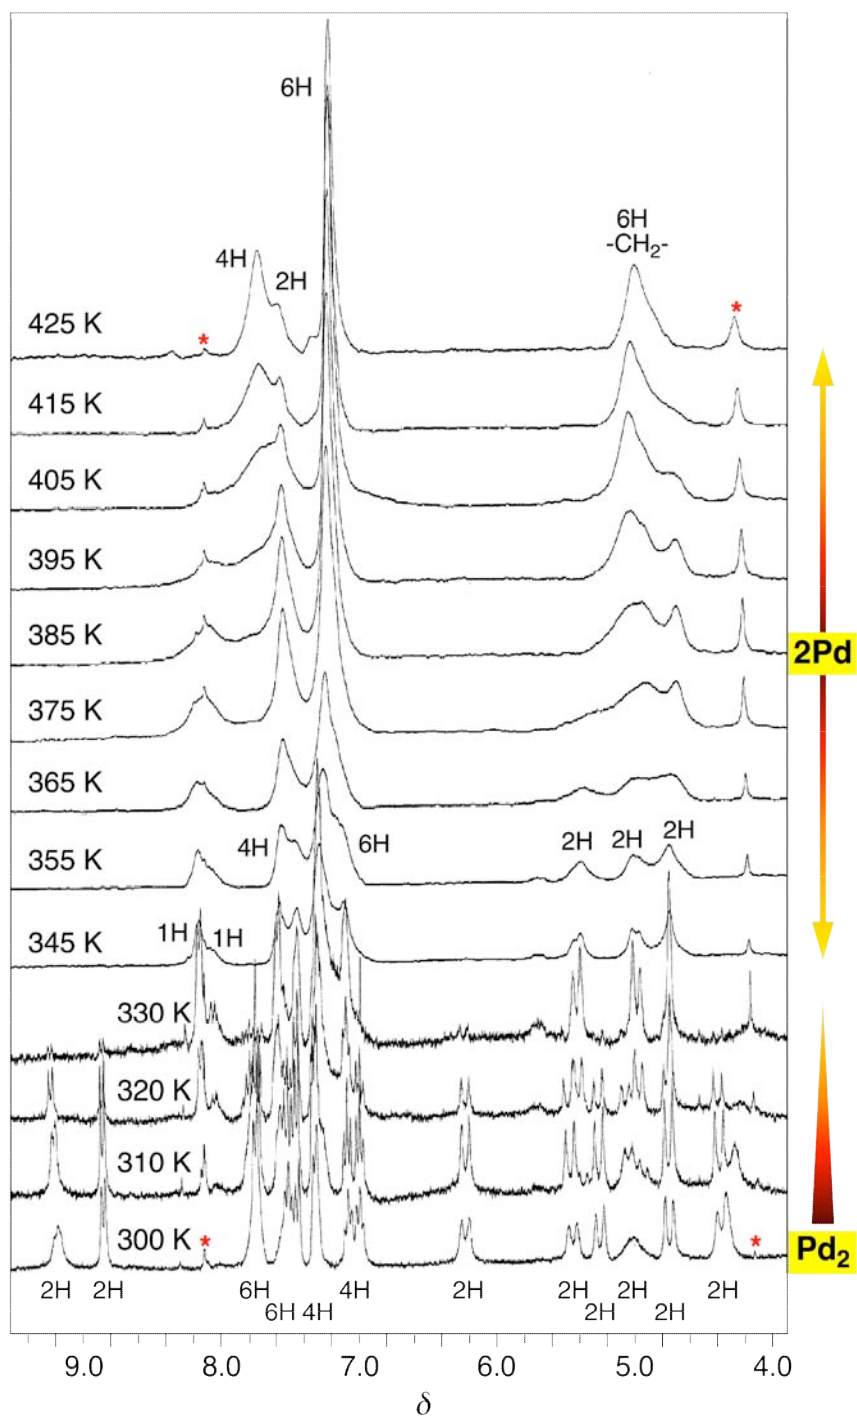

**ESI Fig. B8.** 300 MHz variable temperature <sup>1</sup>H NMR spectra for [Pd(tbima)<sub>2</sub>Cl]<sub>2</sub><sup>2+</sup> in d<sub>6</sub>-dmsol solution. The first four spectra (from the bottom) show the clean break-up of the dimer (36 protons) to afford the monomer, [Pd(tbima)Cl]<sup>+</sup> (18 protons). The subsequent nine spectra show the changes in the NMR spectrum of the monomeric cation at increasingly higher temperatures; all changes in the latter nine spectra were completely reversed on cooling (\* denotes a peak for an impurity).
